# Supplementary material
Source: MDPI journal article supplement (https://www.mdpi.com/2077-0472/13/5/1100)
Supplement: s1 [file s1]

Table S1. Rain fall, relative humidity, minimum and maximum temperature of MUARIK and NaSARRI in 2019, 2020 and 2021

| Month | NaSARRI    |             |             |           | MUARIK     |             |             |           |            |             |             |           |            |             |             |           |
|-------|------------|-------------|-------------|-----------|------------|-------------|-------------|-----------|------------|-------------|-------------|-----------|------------|-------------|-------------|-----------|
|       | 2019       |             |             |           | 2019       |             |             |           | 2020       |             |             |           | 2021       |             |             |           |
|       | RF<br>(mm) | Max<br>(°C) | Min<br>(°C) | RH<br>(%) |
| JAN   | 46.0       | 31.4        | 17.9        | 67        | 45.7       | 30.3        | 17.6        | 86        | 83.3       | 28.7        | 17.5        | 87        | 35.8       | 27.3        | 17.5        | 90        |
| FEB   | 150        | 34.1        | 18.6        | 67        | 73.2       | 31.4        | 17.9        | 83        | 129        | 29.1        | 17.6        | 91        | 108        | 28.9        | 17.4        | 89        |
| MAR   | 130        | 34.2        | 18.8        | 69        | 39.8       | 31.3        | 18.4        | 85        | 238        | 28.6        | 18.2        | 90        | 98.1       | 29.3        | 18.2        | 87        |
| APR   | 137        | 32.1        | 18.4        | 77        | 110        | 29.8        | 18.7        | 87        | 164        | 28.3        | 18.5        | 90        | 225        | 27.7        | 18.4        | 88        |
| MAY   | 281        | 29.6        | 17.5        | 77        | 206        | 28.0        | 18.5        | 90        | 78.9       | 27.5        | 18.2        | 91        | 169        | 27.4        | 18.3        | 88        |
| JUN   | 85.1       | 27.7        | 17.9        | 78        | 232        | 26.8        | 18.2        | 92        | 40.1       | 26.7        | 17.3        | 86        | 162        | 27.4        | 18.0        | 87        |
| JUL   | 97.5       | 27.8        | 17.8        | 79        | 45.0       | 27.1        | 17.1        | 93        | 66.5       | 26.8        | 17.1        | 90        | 35.3       | 27.0        | 17.6        | 90        |
| AUG   | 174        | 28.2        | 16.0        | 83        | 126        | 27.2        | 17.7        | 90        | 112        | 28          | 17.4        | 88        | 43.2       | 28.1        | 18.3        | 88        |
| SEP   | 214        | 29          | 16.0        | 82        | 146        | 27.7        | 17.7        | 91        | 146        | 28.1        | 17.9        | 87        | 126        | 27.5        | 18.2        | 89        |
| OCT   | 217        | 27.6        | 15.8        | 83        | 201        | 27.0        | 18.1        | 86        | 82.6       | 27.6        | 18.0        | 89        | 141        | 29.2        | 18.1        | 89        |
| NOV   | 131        | 27.2        | 15.9        | 80        | 220        | 27.5        | 18          | 89        | 260        | 26.7        | 17.5        | 89        | 89.5       | 28.6        | 18.1        | 88        |
| DEC   | 264        | 28.2        | 15.5        | 83        | 215        | 26.8        | 17.6        | 89        | 97.4       | 27.9        | 17.3        | 88        | 98.7       | 28.7        | 18.3        | 89        |

RF - rain fall, Max - maximum temperature, Min - minimum temperature and RH - relative humidity

Source: (Namulonge, 2022)

Table S2. Mean and ranges of traits evaluated at MUARIK and NaSARRI during 2019, 2020 and 2021

|                 |      | Incidence |       |       | Severity |       |       | HSW | DTF  | PQ  | SV  | PH   | PL   |
|-----------------|------|-----------|-------|-------|----------|-------|-------|-----|------|-----|-----|------|------|
|                 |      | 14WAP     | 15WAP | 16WAP | 14WAP    | 15WAP | 16WAP |     |      |     |     |      |      |
| MUARIK<br>2020  | Min  | 3.0       | 11.5  | 6.0   | 1.0      | 1.5   | 1.5   | 1.5 | 57.5 | 5.3 | 2.0 | 62.1 | 9.5  |
|                 | Max  | 100       | 100   | 100   | 5.0      | 5.0   | 5.0   | 5.6 | 99.0 | 8.8 | 5.0 | 284  | 56.0 |
|                 | Mean | 34.2      | 60.8  | 69.4  | 2.0      | 2.8   | 2.8   | 3.1 | 78.1 | 6.9 | 4.0 | 118  | 25.1 |
| MUARIK<br>2021  | Min  | 8.5       | 9.0   | 8.0   | 1.7      | 1.8   | 1.8   | 1.1 | 64.0 | 5.5 |     | 38   | 8.7  |
|                 | Max  | 100       | 100   | 100   | 4.5      | 5.0   | 5.0   | 4.7 | 108  | 8.0 |     | 245  | 54.3 |
|                 | Mean | 54.3      | 61.2  | 66.8  | 3.0      | 3.1   | 3.2   | 3.0 | 83.7 | 6.6 |     | 105  | 24.6 |
| MUARIK<br>2019  | Min  |           |       | 8.5   |          |       | 1.5   | 1.7 | 45.5 | 4.5 | 1.0 |      |      |
|                 | Max  |           |       | 100   |          |       | 5.0   | 4.7 | 96.0 | 8.5 | 4.0 |      |      |
|                 | Mean |           |       | 59.6  |          |       | 3.7   | 3.0 | 68.6 | 6.7 | 2.0 |      |      |
| NaSARRI<br>2019 | Min  |           |       | 0.0   |          |       | 1.0   |     | 47.5 | 5.0 | 1.0 |      |      |
|                 | Max  |           |       | 100   |          |       | 5.0   |     | 93.0 | 8.0 | 4.0 |      |      |
|                 | Mean |           |       | 23.8  |          |       | 1.9   |     | 71.9 | 6.8 | 19  |      |      |

WAP - weeks after planting, HSW – hundred seed weight, DTF - days to 50% flowering, PQ - pollen quantity, PH – plant height, PL – panicle length and SV – seedling vigourity
